# Supplementary material
Source: HighWire-hosted journal article supplement (http://thorax.bmjjournals.com/highwire/filestream/174130/field_highwire_adjunct_files/5/JB_Supplementary_Table_2.pdf)
Supplement: JB_Supplementary_Table_2.pdf [file JB_Supplementary_Table_2.pdf]

**Supplementary Table 2.** Statistically over-represented ( $p < 0.1$ ) processes from DAVID analysis when comparing a list of genes with HTE-selective DHS in their promoter to all human genes.

| Category        | Term                                             | Count | %           | PValue   | List Total | Pop Hits | Pop Total | Fold Enrichment | Bonferroni  | Benjamini   | FDR         |
|-----------------|--------------------------------------------------|-------|-------------|----------|------------|----------|-----------|-----------------|-------------|-------------|-------------|
| GOTERM_BP_FAT   | GO:0030855~epithelial cell differentiation       | 24    | 2.274881517 | 1.46E-06 | 727        | 136      | 13114     | 3.183267255     | 0.004005499 | 0.004005499 | 0.002603367 |
| GOTERM_BP_FAT   | GO:0060429~epithelium development                | 32    | 3.033175355 | 2.64E-06 | 727        | 226      | 13114     | 2.554125939     | 0.00722096  | 0.003617022 | 0.004700787 |
| GOTERM_CC_FAT   | GO:0044459~plasma membrane part                  | 171   | 16.20853081 | 6.19E-06 | 713        | 2163     | 12337     | 1.367916619     | 0.002696242 | 0.002696242 | 0.008745068 |
| KEGG_PATHWAY    | hsa04080:Neuroactive ligand-receptor interaction | 33    | 3.127962085 | 7.97E-06 | 280        | 255      | 5042      | 2.330336134     | 0.001354196 | 0.001354196 | 0.009724331 |
| GOTERM_BP_FAT   | GO:0007398~ectoderm development                  | 28    | 2.654028436 | 9.69E-06 | 727        | 195      | 13114     | 2.590145664     | 0.026285225 | 0.008839651 | 0.017276612 |
| GOTERM_BP_FAT   | GO:0008544~epidermis development                 | 26    | 2.464454976 | 2.14E-05 | 727        | 181      | 13114     | 2.591167821     | 0.057224832 | 0.014623879 | 0.03821622  |
| GOTERM_CC_FAT   | GO:0030054~cell junction                         | 53    | 5.023696682 | 5.38E-05 | 713        | 515      | 12337     | 1.780691458     | 0.023169856 | 0.011652822 | 0.075906008 |
| GOTERM_CC_FAT   | GO:0016327~apicolateral plasma membrane          | 18    | 1.706161137 | 6.02E-05 | 713        | 101      | 12337     | 3.083693222     | 0.025891017 | 0.008705912 | 0.084934776 |
| GOTERM_BP_FAT   | GO:0009913~epidermal cell differentiation        | 14    | 1.327014218 | 1.21E-04 | 727        | 71       | 13114     | 3.556890172     | 0.28385072  | 0.064592793 | 0.216329602 |
| GOTERM_CC_FAT   | GO:0043296~apical junction complex               | 17    | 1.611374408 | 1.43E-04 | 713        | 98       | 12337     | 3.001531328     | 0.060337434 | 0.0154382   | 0.201386465 |
| GOTERM_BP_FAT   | GO:0030216~keratinocyte differentiation          | 13    | 1.232227488 | 2.03E-04 | 727        | 65       | 13114     | 3.607702889     | 0.427357777 | 0.088729675 | 0.360967749 |
| GOTERM_CC_FAT   | GO:0005911~cell-cell junction                    | 25    | 2.369668246 | 2.08E-04 | 713        | 188      | 12337     | 2.300923577     | 0.086641139 | 0.017962009 | 0.293126235 |
| SP_PIR_KEYWORDS | cell junction                                    | 41    | 3.886255924 | 3.19E-04 | 1037       | 398      | 18289     | 1.81682036      | 0.160161888 | 0.160161888 | 0.464234149 |
| GOTERM_CC_FAT   | GO:0005576~extracellular region                  | 144   | 13.6492891  | 3.76E-04 | 713        | 1906     | 12337     | 1.30725295      | 0.151081616 | 0.026929463 | 0.529150101 |
| UP_SEQ_FEATURE  | site:Stutter                                     | 9     | 0.853080569 | 4.06E-04 | 1037       | 33       | 18267     | 4.804155343     | 0.658523769 | 0.658523769 | 0.717671921 |

|                 |                                                                      |     |             |             |      |      |       |             |             |             |             |
|-----------------|----------------------------------------------------------------------|-----|-------------|-------------|------|------|-------|-------------|-------------|-------------|-------------|
| GOTERM_CC_FAT   | GO:0031226~intrinsic to plasma membrane                              | 98  | 9.289099526 | 4.08E-04    | 713  | 1207 | 12337 | 1.40487874  | 0.162856376 | 0.025074511 | 0.574143656 |
| SP_PIR_KEYWORDS | palmoplantar keratoderma                                             | 7   | 0.663507109 | 4.67E-04    | 1037 | 19   | 18289 | 6.497639953 | 0.225299988 | 0.119829555 | 0.67822803  |
| SP_PIR_KEYWORDS | Secreted                                                             | 125 | 11.84834123 | 5.23E-04    | 1037 | 1643 | 18289 | 1.341787226 | 0.24889175  | 0.090992407 | 0.760079664 |
| SP_PIR_KEYWORDS | signal                                                               | 219 | 20.75829384 | 6.87E-04    | 1037 | 3158 | 18289 | 1.22304713  | 0.31341799  | 0.089723974 | 0.997433532 |
| UP_SEQ_FEATURE  | signal peptide                                                       | 219 | 20.75829384 | 7.52E-04    | 1037 | 3158 | 18267 | 1.221575915 | 0.863642101 | 0.630733296 | 1.326743814 |
| SP_PIR_KEYWORDS | disease mutation                                                     | 119 | 11.27962085 | 0.00105123  | 1037 | 1580 | 18289 | 1.328315003 | 0.437475853 | 0.108691119 | 1.522022576 |
| SP_PIR_KEYWORDS | glycoprotein                                                         | 281 | 26.63507109 | 0.00105427  | 1037 | 4209 | 18289 | 1.177439491 | 0.438400461 | 0.091682272 | 1.52634115  |
| GOTERM_CC_FAT   | GO:0001533~cornified envelope                                        | 7   | 0.663507109 | 0.001216105 | 713  | 22   | 12337 | 5.505482596 | 0.411715488 | 0.064166846 | 1.703855019 |
| SP_PIR_KEYWORDS | developmental protein                                                | 65  | 6.161137441 | 0.001380506 | 1037 | 771  | 18289 | 1.486860356 | 0.530298904 | 0.102328643 | 1.994323298 |
| PIR_SUPERFAMILY | PIRSF002282:cytoskeletal keratin                                     | 11  | 1.042654028 | 0.001442185 | 397  | 60   | 7196  | 3.32308984  | 0.449812067 | 0.449812067 | 2.002767843 |
| GOTERM_CC_FAT   | GO:0005887~integral to plasma membrane                               | 93  | 8.815165877 | 0.001572016 | 713  | 1180 | 12337 | 1.363706706 | 0.496382557 | 0.073383382 | 2.197386278 |
| SP_PIR_KEYWORDS | nitration                                                            | 7   | 0.663507109 | 0.001814657 | 1037 | 24   | 18289 | 5.143964963 | 0.629728686 | 0.116787904 | 2.613813232 |
| GOTERM_BP_FAT   | GO:0051896~regulation of protein kinase B signaling cascade          | 6   | 0.568720379 | 0.001816546 | 727  | 17   | 13114 | 6.366534509 | 0.993250093 | 0.510334297 | 3.190126329 |
| UP_SEQ_FEATURE  | glycosylation site:N-linked (GlcNAc..)                               | 267 | 25.30805687 | 0.002209801 | 1037 | 4021 | 18267 | 1.16967622  | 0.997149444 | 0.858210779 | 3.852165983 |
| GOTERM_BP_FAT   | GO:0051897~positive regulation of protein kinase B signaling cascade | 5   | 0.473933649 | 0.002247701 | 727  | 11   | 13114 | 8.199324747 | 0.99794172  | 0.538482619 | 3.933063974 |
| UP_SEQ_FEATURE  | region of interest:Head                                              | 12  | 1.137440758 | 0.002323703 | 1037 | 72   | 18267 | 2.93587271  | 0.997893344 | 0.785761057 | 4.046877047 |

|                     |                                                                              |     |             |                 |      |       |       |             |             |             |             |
|---------------------|------------------------------------------------------------------------------|-----|-------------|-----------------|------|-------|-------|-------------|-------------|-------------|-------------|
| UP_SEQ_FEATUR<br>E  | region of interest:Coil 2                                                    | 11  | 1.042654028 | 0.0027135<br>56 | 1037 | 63    | 18267 | 3.075676172 | 0.999251905 | 0.762976553 | 4.710501877 |
| UP_SEQ_FEATUR<br>E  | region of interest:Linker 12                                                 | 11  | 1.042654028 | 0.0027135<br>56 | 1037 | 63    | 18267 | 3.075676172 | 0.999251905 | 0.762976553 | 4.710501877 |
| GOTERM_MF_FA<br>T   | GO:0005200~structural<br>constituent of cytoskeleton                         | 12  | 1.137440758 | 0.0027874<br>79 | 710  | 74    | 12549 | 2.866159117 | 0.913052424 | 0.913052424 | 4.242568408 |
| UP_SEQ_FEATUR<br>E  | region of interest:Tail                                                      | 12  | 1.137440758 | 0.0028996<br>86 | 1037 | 74    | 18267 | 2.856524799 | 0.99954373  | 0.72253792  | 5.02581011  |
| SP_PIR_KEYWOR<br>DS | gamma-carboxyglutamic acid                                                   | 6   | 0.568720379 | 0.0034476<br>49 | 1037 | 19    | 18289 | 5.569405674 | 0.848795551 | 0.189336709 | 4.911419817 |
| INTERPRO            | IPR013090:Phospholipase A2,<br>active site                                   | 6   | 0.568720379 | 0.0037935<br>47 | 933  | 19    | 16090 | 5.445929937 | 0.993742753 | 0.993742753 | 6.036205713 |
| INTERPRO            | IPR002383:Coagulation factor,<br>Gla region                                  | 5   | 0.473933649 | 0.0038055<br>87 | 933  | 12    | 16090 | 7.185602001 | 0.993842902 | 0.921532825 | 6.054806937 |
| UP_SEQ_FEATUR<br>E  | sequence variant                                                             | 710 | 67.2985782  | 0.0041237<br>19 | 1037 | 11801 | 18267 | 1.059809994 | 0.999982377 | 0.79065246  | 7.074954672 |
| GOTERM_CC_FAT       | GO:0044463~cell projection<br>part                                           | 25  | 2.369668246 | 0.0042124<br>65 | 713  | 233   | 12337 | 1.856539195 | 0.841264163 | 0.168106945 | 5.787549548 |
| SP_PIR_KEYWOR<br>DS | polymorphism                                                                 | 684 | 64.83412322 | 0.0044011<br>92 | 1037 | 11351 | 18289 | 1.06275506  | 0.91043274  | 0.214375663 | 6.229594075 |
| GOTERM_CC_FAT       | GO:0030057~desmosome                                                         | 6   | 0.568720379 | 0.0047358<br>36 | 713  | 20    | 12337 | 5.19088359  | 0.873780085 | 0.171515566 | 6.484462468 |
| SP_PIR_KEYWOR<br>DS | rna editing                                                                  | 5   | 0.473933649 | 0.0048470<br>41 | 1037 | 13    | 18289 | 6.783250501 | 0.929896165 | 0.21464243  | 6.840076393 |
| GOTERM_BP_FAT       | GO:0051967~negative<br>regulation of synaptic<br>transmission, glutamatergic | 4   | 0.379146919 | 0.0049994<br>1  | 727  | 7     | 13114 | 10.30772254 | 0.999998962 | 0.783653053 | 8.54933666  |
| UP_SEQ_FEATUR<br>E  | DNA-binding region:Homeobox                                                  | 21  | 1.990521327 | 0.0050852<br>39 | 1037 | 188   | 18267 | 1.967659369 | 0.999998636 | 0.815138022 | 8.655292755 |
| GOTERM_BP_FAT       | GO:0007409~axonogenesis                                                      | 21  | 1.990521327 | 0.0051384<br>89 | 727  | 193   | 13114 | 1.962739913 | 0.999999293 | 0.757368726 | 8.777004991 |
| UP_SEQ_FEATUR<br>E  | region of interest:Coil 1B                                                   | 11  | 1.042654028 | 0.0053189<br>78 | 1037 | 69    | 18267 | 2.80822607  | 0.999999268 | 0.791898841 | 9.035611542 |

|                     |                                                                        |    |             |                 |      |     |       |             |             |             |             |
|---------------------|------------------------------------------------------------------------|----|-------------|-----------------|------|-----|-------|-------------|-------------|-------------|-------------|
| UP_SEQ_FEATUR<br>E  | region of interest:Linker 1                                            | 11 | 1.042654028 | 0.0053189<br>78 | 1037 | 69  | 18267 | 2.80822607  | 0.999999268 | 0.791898841 | 9.035611542 |
| UP_SEQ_FEATUR<br>E  | region of interest:Coil 1A                                             | 11 | 1.042654028 | 0.0053189<br>78 | 1037 | 69  | 18267 | 2.80822607  | 0.999999268 | 0.791898841 | 9.035611542 |
| SP_PIR_KEYWOR<br>DS | keratinization                                                         | 8  | 0.758293839 | 0.0057345<br>95 | 1037 | 39  | 18289 | 3.6177336   | 0.956969754 | 0.230607729 | 8.044362213 |
| UP_SEQ_FEATUR<br>E  | region of interest:Rod                                                 | 11 | 1.042654028 | 0.0058981<br>32 | 1037 | 70  | 18267 | 2.768108555 | 0.999999844 | 0.79133829  | 9.971529305 |
| GOTERM_BP_FAT       | GO:0048667~cell<br>morphogenesis involved in<br>neuron differentiation | 22 | 2.085308057 | 0.0059867<br>91 | 727  | 209 | 13114 | 1.898790994 | 0.999999932 | 0.777014823 | 10.15410736 |
| UP_SEQ_FEATUR<br>E  | domain:Gla                                                             | 5  | 0.473933649 | 0.0065126<br>56 | 1037 | 14  | 18267 | 6.291155807 | 0.99999997  | 0.792680765 | 10.95466674 |
| GOTERM_BP_FAT       | GO:0030182~neuron<br>differentiation                                   | 38 | 3.601895735 | 0.0065194<br>89 | 727  | 437 | 13114 | 1.568566473 | 0.999999984 | 0.776511658 | 11.00881525 |
| GOTERM_MF_FA<br>T   | GO:0008376~acetylgalactosami<br>nyltransferase activity                | 7  | 0.663507109 | 0.0069666<br>75 | 710  | 31  | 12549 | 3.991049523 | 0.997795322 | 0.953046    | 10.28892686 |
| INTERPRO            | IPR000294:Gamma-<br>carboxyglutamic acid-rich<br>(GLA) domain          | 5  | 0.473933649 | 0.0070135<br>7  | 933  | 14  | 16090 | 6.159087429 | 0.999916953 | 0.956371082 | 10.8896597  |
| GOTERM_BP_FAT       | GO:0006811~ion transport                                               | 59 | 5.592417062 | 0.0072145<br>91 | 727  | 757 | 13114 | 1.405907995 | 0.999999998 | 0.783710729 | 12.11256067 |
| GOTERM_CC_FAT       | GO:0045095~keratin filament                                            | 12 | 1.137440758 | 0.0072527<br>5  | 713  | 82  | 12337 | 2.532138337 | 0.958152451 | 0.232392572 | 9.769534682 |
| GOTERM_CC_FAT       | GO:0031012~extracellular<br>matrix                                     | 32 | 3.033175355 | 0.0073433<br>16 | 713  | 339 | 12337 | 1.633316371 | 0.959784359 | 0.219009468 | 9.885718341 |
| GOTERM_BP_FAT       | GO:0048812~neuron projection<br>morphogenesis                          | 22 | 2.085308057 | 0.0074005<br>4  | 727  | 213 | 13114 | 1.863132947 | 0.999999999 | 0.767427334 | 12.40562768 |
| GOTERM_BP_FAT       | GO:0031424~keratinization                                              | 8  | 0.758293839 | 0.0076643<br>21 | 727  | 42  | 13114 | 3.435907513 | 0.999999999 | 0.75586281  | 12.81978292 |
| GOTERM_BP_FAT       | GO:0001655~urogenital system<br>development                            | 14 | 1.327014218 | 0.0076787<br>47 | 727  | 110 | 13114 | 2.295810929 | 0.999999999 | 0.734036458 | 12.84237858 |
| SMART               | SM00069:GLA                                                            | 5  | 0.473933649 | 0.0078772<br>33 | 530  | 14  | 8828  | 5.948787062 | 0.880849238 | 0.880849238 | 9.870368755 |

|                |                                                                                           |     |             |                 |      |      |       |             |             |             |             |
|----------------|-------------------------------------------------------------------------------------------|-----|-------------|-----------------|------|------|-------|-------------|-------------|-------------|-------------|
| SP_PIR_KEYWORD | cysteine proteinase inhibitor                                                             | 4   | 0.379146919 | 0.0081858<br>94 | 1037 | 8    | 18289 | 8.818225651 | 0.98884772  | 0.292384716 | 11.29553046 |
| GOTERM_CC_FAT  | GO:0044421~extracellular region part                                                      | 73  | 6.91943128  | 0.0087099<br>84 | 713  | 946  | 12337 | 1.335216709 | 0.977944384 | 0.238482405 | 11.62216719 |
| INTERPRO       | IPR003267:Small proline-rich                                                              | 6   | 0.568720379 | 0.0090583<br>54 | 933  | 23   | 16090 | 4.498811687 | 0.999994701 | 0.952021462 | 13.84842768 |
| GOTERM_BP_FAT  | GO:0048858~cell projection morphogenesis                                                  | 24  | 2.274881517 | 0.0092546<br>61 | 727  | 245  | 13114 | 1.76703815  | 1           | 0.777649686 | 15.27782783 |
| SP_PIR_KEYWORD | Intermediate filament                                                                     | 11  | 1.042654028 | 0.0094892<br>83 | 1037 | 75   | 18289 | 2.586679524 | 0.994567863 | 0.311011147 | 12.98030563 |
| INTERPRO       | IPR019412:Outer membrane protein, IML2, mitochondrial/Tetratricopeptide repeat protein 39 | 3   | 0.28436019  | 0.0096679<br>38 | 933  | 3    | 16090 | 17.2454448  | 0.99999767  | 0.925271862 | 14.71247737 |
| UP_SEQ_FEATURE | compositionally biased region:Gly-rich                                                    | 23  | 2.180094787 | 0.0100522<br>38 | 1037 | 227  | 18267 | 1.784803674 | 1           | 0.89249951  | 16.42305863 |
| GOTERM_MF_FAT  | GO:0001653~peptide receptor activity                                                      | 14  | 1.327014218 | 0.0104325<br>36 | 710  | 112  | 12549 | 2.209330986 | 0.99989655  | 0.953056311 | 15.03031682 |
| GOTERM_MF_FAT  | GO:0008528~peptide receptor activity, G-protein coupled                                   | 14  | 1.327014218 | 0.0104325<br>36 | 710  | 112  | 12549 | 2.209330986 | 0.99989655  | 0.953056311 | 15.03031682 |
| SP_PIR_KEYWORD | ion transport                                                                             | 47  | 4.454976303 | 0.0112495<br>56 | 1037 | 574  | 18289 | 1.444099671 | 0.997946852 | 0.338045686 | 15.20837449 |
| GOTERM_BP_FAT  | GO:0006812~cation transport                                                               | 44  | 4.170616114 | 0.0120099<br>23 | 727  | 545  | 13114 | 1.456320432 | 1           | 0.842019764 | 19.38224769 |
| INTERPRO       | IPR003117:cAMP-dependent protein kinase, regulatory subunit, type I/II alpha/beta         | 4   | 0.379146919 | 0.0125040<br>79 | 933  | 9    | 16090 | 7.664642134 | 0.999999949 | 0.939171579 | 18.62661972 |
| SMART          | SM00394:RIIa                                                                              | 4   | 0.379146919 | 0.0136933<br>2  | 530  | 9    | 8828  | 7.40293501  | 0.975496894 | 0.843465321 | 16.5716003  |
| GOTERM_MF_FAT  | GO:0004623~phospholipase A2 activity                                                      | 6   | 0.568720379 | 0.0138685<br>52 | 710  | 26   | 12549 | 4.078764897 | 0.999995069 | 0.952876292 | 19.49861604 |
| SP_PIR_KEYWORD | G protein-coupled receptor                                                                | 14  | 1.327014218 | 0.0141774<br>45 | 1037 | 116  | 18289 | 2.128537226 | 0.99959457  | 0.386245381 | 18.79703379 |
| GOTERM_CC_FAT  | GO:0005886~plasma                                                                         | 239 | 22.65402844 | 0.0145350       | 713  | 3663 | 12337 | 1.128966401 | 0.998311314 | 0.346613847 | 18.6804648  |

|                 |                                                                          |    |             |                 |      |     |       |             |             |             |             |
|-----------------|--------------------------------------------------------------------------|----|-------------|-----------------|------|-----|-------|-------------|-------------|-------------|-------------|
|                 | membrane                                                                 |    |             | 84              |      |     |       |             |             |             |             |
| SP_PIR_KEYWORD  | heterotetramer                                                           | 7  | 0.663507109 | 0.0147369<br>88 | 1037 | 36  | 18289 | 3.429309975 | 0.999702805 | 0.37979982  | 19.46654383 |
| UP_SEQ_FEATURE  | metal ion-binding site:Calcium;<br>via carbonyl oxygen                   | 7  | 0.663507109 | 0.0148175<br>81 | 1037 | 36  | 18267 | 3.425184828 | 1           | 0.952258793 | 23.28609384 |
| PIR_SUPERFAMILY | PIRSF005670:polypeptide N-<br>acetylgalactosaminyltransferase            | 4  | 0.379146919 | 0.0148513<br>06 | 397  | 10  | 7196  | 7.250377834 | 0.997959487 | 0.954827962 | 18.9209102  |
| SP_PIR_KEYWORD  | calcium                                                                  | 61 | 5.781990521 | 0.0149752<br>99 | 1037 | 798 | 18289 | 1.348149786 | 0.999739639 | 0.367784275 | 19.75012684 |
| GOTERM_BP_FAT   | GO:0032990~cell part<br>morphogenesis                                    | 24 | 2.274881517 | 0.0150968<br>69 | 727  | 256 | 13114 | 1.691110729 | 1           | 0.889300317 | 23.75760545 |
| GOTERM_BP_FAT   | GO:0031175~neuron projection<br>development                              | 24 | 2.274881517 | 0.0150968<br>69 | 727  | 256 | 13114 | 1.691110729 | 1           | 0.889300317 | 23.75760545 |
| GOTERM_CC_FAT   | GO:0031526~brush border<br>membrane                                      | 6  | 0.568720379 | 0.0150971<br>71 | 713  | 26  | 12337 | 3.992987377 | 0.998683212 | 0.339352595 | 19.33307865 |
| GOTERM_BP_FAT   | GO:0007411~axon guidance                                                 | 13 | 1.232227488 | 0.0151078<br>78 | 727  | 107 | 13114 | 2.191595213 | 1           | 0.87661232  | 23.7728007  |
| INTERPRO        | IPR012287:Homeodomain-<br>related                                        | 23 | 2.180094787 | 0.0151170<br>71 | 933  | 231 | 16090 | 1.71707892  | 0.999999999 | 0.945254227 | 22.08292971 |
| INTERPRO        | IPR000832:GPCR, family 2,<br>secretin-like                               | 8  | 0.758293839 | 0.0158470<br>98 | 933  | 46  | 16090 | 2.999207792 | 0.999999999 | 0.930446718 | 23.02364005 |
| GOTERM_MF_FAT   | GO:0004653~polypeptide N-<br>acetylgalactosaminyltransferase<br>activity | 5  | 0.473933649 | 0.0163827<br>64 | 710  | 18  | 12549 | 4.909624413 | 0.999999472 | 0.94446423  | 22.62782727 |
| PIR_SUPERFAMILY | PIRSF000548:PK_regulatory                                                | 3  | 0.28436019  | 0.0168302<br>49 | 397  | 4   | 7196  | 13.59445844 | 0.999112431 | 0.903897627 | 21.17438518 |
| PIR_SUPERFAMILY | PIRSF000548:cAMP-dependent<br>protein kinase, regulatory<br>subunit      | 3  | 0.28436019  | 0.0168302<br>49 | 397  | 4   | 7196  | 13.59445844 | 0.999112431 | 0.903897627 | 21.17438518 |
| UP_SEQ_FEATURE  | binding site:cAMP 1                                                      | 3  | 0.28436019  | 0.0178569<br>69 | 1037 | 4   | 18267 | 13.21142719 | 1           | 0.966936496 | 27.38179624 |
| UP_SEQ_FEATURE  | region of interest:Dimerization<br>and phosphorylation                   | 3  | 0.28436019  | 0.0178569<br>69 | 1037 | 4   | 18267 | 13.21142719 | 1           | 0.966936496 | 27.38179624 |

|                     |                                                                  |     |             |                 |      |      |       |             |             |             |             |
|---------------------|------------------------------------------------------------------|-----|-------------|-----------------|------|------|-------|-------------|-------------|-------------|-------------|
| UP_SEQ_FEATUR<br>E  | binding site:cAMP 2                                              | 3   | 0.28436019  | 0.0178569<br>69 | 1037 | 4    | 18267 | 13.21142719 | 1           | 0.966936496 | 27.38179624 |
| INTERPRO            | IPR003302:Cornefin (SPRR)                                        | 3   | 0.28436019  | 0.0185944<br>09 | 933  | 4    | 16090 | 12.9340836  | 1           | 0.938217572 | 26.46909712 |
| INTERPRO            | IPR012198:cAMP-dependent<br>protein kinase regulatory<br>subunit | 3   | 0.28436019  | 0.0185944<br>09 | 933  | 4    | 16090 | 12.9340836  | 1           | 0.938217572 | 26.46909712 |
| UP_SEQ_FEATUR<br>E  | domain:PDZ 3                                                     | 6   | 0.568720379 | 0.0192117<br>01 | 1037 | 28   | 18267 | 3.774693484 | 1           | 0.967476766 | 29.14006853 |
| UP_SEQ_FEATUR<br>E  | topological domain:Cytoplasmic                                   | 213 | 20.18957346 | 0.0193147<br>86 | 1037 | 3287 | 18267 | 1.141480171 | 1           | 0.960406495 | 29.27220125 |
| INTERPRO            | IPR017970:Homeobox,<br>conserved site                            | 22  | 2.085308057 | 0.0194040<br>49 | 933  | 223  | 16090 | 1.70134433  | 1           | 0.926898255 | 27.45652086 |
| SP_PIR_KEYWOR<br>DS | keratin                                                          | 15  | 1.421800948 | 0.0197104<br>56 | 1037 | 134  | 18289 | 1.974229623 | 0.999981343 | 0.436236612 | 25.1955628  |
| INTERPRO            | IPR017983:GPCR, family 2,<br>secretin-like, conserved site       | 8   | 0.758293839 | 0.0197392<br>57 | 933  | 48   | 16090 | 2.8742408   | 1           | 0.911041716 | 27.86167784 |
| UP_SEQ_FEATUR<br>E  | region of interest:Catalytic<br>subdomain A                      | 5   | 0.473933649 | 0.0201267<br>6  | 1037 | 19   | 18267 | 4.635588489 | 1           | 0.957921308 | 30.30488318 |
| UP_SEQ_FEATUR<br>E  | region of interest:Catalytic<br>subdomain B                      | 5   | 0.473933649 | 0.0201267<br>6  | 1037 | 19   | 18267 | 4.635588489 | 1           | 0.957921308 | 30.30488318 |
| GOTERM_MF_FA<br>T   | GO:0030414~peptidase<br>inhibitor activity                       | 16  | 1.516587678 | 0.0201340<br>35 | 710  | 148  | 12549 | 1.910772745 | 0.999999981 | 0.948500087 | 27.085775   |
| INTERPRO            | IPR001356:Homeobox                                               | 22  | 2.085308057 | 0.0202887<br>26 | 933  | 224  | 16090 | 1.693749043 | 1           | 0.897749774 | 28.52121555 |
| UP_SEQ_FEATUR<br>E  | compositionally biased<br>region:Ala-rich                        | 16  | 1.516587678 | 0.0209674<br>97 | 1037 | 148  | 18267 | 1.904349866 | 1           | 0.955777694 | 31.35914154 |
| GOTERM_BP_FAT       | GO:0030001~metal ion<br>transport                                | 37  | 3.507109005 | 0.0217759<br>55 | 727  | 459  | 13114 | 1.454085042 | 1           | 0.943981391 | 32.46931445 |
| GOTERM_CC_FAT       | GO:0005923~tight junction                                        | 10  | 0.947867299 | 0.0221690<br>51 | 713  | 72   | 12337 | 2.403186847 | 0.999943114 | 0.437277126 | 27.13878682 |
| GOTERM_CC_FAT       | GO:0070160~occluding<br>junction                                 | 10  | 0.947867299 | 0.0221690<br>51 | 713  | 72   | 12337 | 2.403186847 | 0.999943114 | 0.437277126 | 27.13878682 |

|                 |                                                                          |    |             |                 |      |     |       |             |             |             |             |
|-----------------|--------------------------------------------------------------------------|----|-------------|-----------------|------|-----|-------|-------------|-------------|-------------|-------------|
| SP_PIR_KEYWORD  | Homeobox                                                                 | 22 | 2.085308057 | 0.0222188<br>99 | 1037 | 231 | 18289 | 1.679662029 | 0.999995406 | 0.459110157 | 27.93884032 |
| GOTERM_BP_FAT   | GO:0044259~multicellular organismal macromolecule metabolic process      | 6  | 0.568720379 | 0.0231011<br>22 | 727  | 30  | 13114 | 3.607702889 | 1           | 0.946090819 | 34.08210175 |
| GOTERM_CC_FAT   | GO:0042734~presynaptic membrane                                          | 6  | 0.568720379 | 0.0236519<br>47 | 713  | 29  | 12337 | 3.579919718 | 0.999970648 | 0.439982141 | 28.68386541 |
| INTERPRO        | IPR001478:PDZ/DHR/GLGF                                                   | 16 | 1.516587678 | 0.0246946<br>96 | 933  | 148 | 16090 | 1.864372411 | 1           | 0.923295342 | 33.60875275 |
| PIR_SUPERFAMILY | PIRSF005503:G protein-coupled receptor, peptide hormone receptor type    | 4  | 0.379146919 | 0.0250871<br>46 | 397  | 12  | 7196  | 6.041981528 | 0.99997297  | 0.927895907 | 29.96357956 |
| GOTERM_BP_FAT   | GO:0030198~extracellular matrix organization                             | 12 | 1.137440758 | 0.0253285<br>44 | 727  | 102 | 13114 | 2.12217817  | 1           | 0.953407248 | 36.71134635 |
| GOTERM_MF_FAT   | GO:0043565~sequence-specific DNA binding                                 | 46 | 4.360189573 | 0.0254246<br>25 | 710  | 592 | 12549 | 1.37336791  | 1           | 0.960012042 | 32.96588572 |
| GOTERM_CC_FAT   | GO:0005578~proteinaceous extracellular matrix                            | 28 | 2.654028436 | 0.0257826<br>33 | 713  | 315 | 12337 | 1.538039582 | 0.999988677 | 0.450861349 | 30.85066051 |
| PIR_SUPERFAMILY | PIRSF800007:secretin receptor-like G protein-coupled receptors           | 7  | 0.663507109 | 0.0261207<br>08 | 397  | 42  | 7196  | 3.020990764 | 0.999982577 | 0.888255827 | 30.99724981 |
| INTERPRO        | IPR000372:Leucine-rich repeat, cysteine-rich flanking region, N-terminal | 12 | 1.137440758 | 0.0261490<br>21 | 933  | 98  | 16090 | 2.111687119 | 1           | 0.920075825 | 35.21200434 |
| GOTERM_BP_FAT   | GO:0015672~monovalent inorganic cation transport                         | 27 | 2.559241706 | 0.0261715<br>29 | 727  | 314 | 13114 | 1.551082452 | 1           | 0.952052871 | 37.68033162 |
| GOTERM_BP_FAT   | GO:0015909~long-chain fatty acid transport                               | 5  | 0.473933649 | 0.0262501<br>06 | 727  | 21  | 13114 | 4.294884391 | 1           | 0.94633654  | 37.76993595 |
| GOTERM_MF_FAT   | GO:0004866~endopeptidase inhibitor activity                              | 15 | 1.421800948 | 0.0268245<br>89 | 710  | 140 | 12549 | 1.893712274 | 1           | 0.948901928 | 34.44588563 |
| SP_PIR_KEYWORD  | epidermolysis bullosa                                                    | 4  | 0.379146919 | 0.0271385<br>64 | 1037 | 12  | 18289 | 5.878817101 | 0.999999709 | 0.511621319 | 33.04906342 |
| SMART           | SM00389:HOX                                                              | 22 | 2.085308057 | 0.0273512<br>29 | 530  | 224 | 8828  | 1.635916442 | 0.999424328 | 0.916812422 | 30.53988515 |
| GOTERM_BP_FAT   | GO:0042574~retinal metabolic                                             | 3  | 0.28436019  | 0.0273657       | 727  | 5   | 13114 | 10.82310867 | 1           | 0.946801772 | 39.02911395 |



|                |                                                           |    |             |                 |      |     |       |             |             |   |             |             |
|----------------|-----------------------------------------------------------|----|-------------|-----------------|------|-----|-------|-------------|-------------|---|-------------|-------------|
|                | process                                                   |    |             | 58              |      |     |       |             |             |   |             |             |
| GOTERM_BP_FAT  | GO:0007598~blood coagulation, extrinsic pathway           | 3  | 0.28436019  | 0.0273657<br>58 | 727  | 5   | 13114 | 10.82310867 |             | 1 | 0.946801772 | 39.02911395 |
| GOTERM_BP_FAT  | GO:0043288~apocarotenoid metabolic process                | 3  | 0.28436019  | 0.0273657<br>58 | 727  | 5   | 13114 | 10.82310867 |             | 1 | 0.946801772 | 39.02911395 |
| KEGG_PATHWAY   | hsa04530:Tight junction                                   | 14 | 1.327014218 | 0.0282429<br>21 | 280  | 131 | 5042  | 1.924427481 | 0.992329721 |   | 0.912419869 | 29.49723129 |
| GOTERM_MF_FAT  | GO:0005509~calcium ion binding                            | 66 | 6.255924171 | 0.0282567<br>54 | 710  | 910 | 12549 | 1.281897539 |             | 1 | 0.938378518 | 35.92825151 |
| GOTERM_BP_FAT  | GO:0042471~ear morphogenesis                              | 9  | 0.853080569 | 0.0286161       | 727  | 66  | 13114 | 2.459797424 |             | 1 | 0.947975619 | 40.41171711 |
| UP_SEQ_FEATURE | nucleotide phosphate-binding region:cAMP 2                | 3  | 0.28436019  | 0.0286493<br>57 | 1037 | 5   | 18267 | 10.56914176 |             | 1 | 0.982623869 | 40.31928304 |
| UP_SEQ_FEATURE | nucleotide phosphate-binding region:cAMP 1                | 3  | 0.28436019  | 0.0286493<br>57 | 1037 | 5   | 18267 | 10.56914176 |             | 1 | 0.982623869 | 40.31928304 |
| GOTERM_MF_FAT  | GO:0042165~neurotransmitter binding                       | 12 | 1.137440758 | 0.0288188<br>65 | 710  | 102 | 12549 | 2.07937034  |             | 1 | 0.922594684 | 36.50144833 |
| GOTERM_BP_FAT  | GO:0048568~embryonic organ development                    | 17 | 1.611374408 | 0.0290823<br>78 | 727  | 172 | 13114 | 1.782876427 |             | 1 | 0.944845022 | 40.91970022 |
| GOTERM_BP_FAT  | GO:0007423~sensory organ development                      | 21 | 1.990521327 | 0.0292731<br>14 | 727  | 229 | 13114 | 1.654186914 |             | 1 | 0.940173977 | 41.12631504 |
| GOTERM_BP_FAT  | GO:0000904~cell morphogenesis involved in differentiation | 22 | 2.085308057 | 0.0300801<br>42 | 727  | 244 | 13114 | 1.626423433 |             | 1 | 0.939107778 | 41.99300746 |
| INTERPRO       | IPR000483:Cysteine-rich flanking region, C-terminal       | 11 | 1.042654028 | 0.0306530<br>81 | 933  | 88  | 16090 | 2.1556806   |             | 1 | 0.937388826 | 39.94973231 |
| GOTERM_BP_FAT  | GO:0051046~regulation of secretion                        | 19 | 1.800947867 | 0.0314272<br>74 | 727  | 202 | 13114 | 1.696691953 |             | 1 | 0.941082756 | 43.41295999 |
| SMART          | SM00228:PDZ                                               | 16 | 1.516587678 | 0.0315152<br>78 | 530  | 148 | 8828  | 1.800713921 | 0.999818467 |   | 0.883924905 | 34.34752843 |
| SMART          | SM00013:LRRNT                                             | 12 | 1.137440758 | 0.0320481<br>7  | 530  | 98  | 8828  | 2.039584136 | 0.999843448 |   | 0.82664695  | 34.82063813 |
| SP_PIR_KEYWORD | cleavage on pair of basic                                 | 24 | 2.274881517 | 0.032395        | 1037 | 269 | 18289 | 1.573512384 | 0.999999985 |   | 0.559036285 | 38.13481275 |

|                 |                                                          |     |             |             |      |      |       |             |             |             |             |
|-----------------|----------------------------------------------------------|-----|-------------|-------------|------|------|-------|-------------|-------------|-------------|-------------|
| DS              | residues                                                 |     |             |             |      |      |       |             |             |             |             |
| GOTERM_MF_FAT   | GO:0031420~alkali metal ion binding                      | 21  | 1.990521327 | 0.032420239 | 710  | 227  | 12549 | 1.635099584 | 1           | 0.927314451 | 40.06153293 |
| GOTERM_BP_FAT   | GO:0048562~embryonic organ morphogenesis                 | 14  | 1.327014218 | 0.032773934 | 727  | 133  | 13114 | 1.898790994 | 1           | 0.942883176 | 44.79957656 |
| UP_SEQ_FEATURE  | disulfide bond                                           | 176 | 16.68246445 | 0.033679725 | 1037 | 2715 | 18267 | 1.141908501 | 1           | 0.989302344 | 45.57572205 |
| SP_PIR_KEYWORDS | synapse                                                  | 20  | 1.895734597 | 0.033807238 | 1037 | 213  | 18289 | 1.656004817 | 0.999999993 | 0.558655501 | 39.43852201 |
| GOTERM_BP_FAT   | GO:0042472~inner ear morphogenesis                       | 8   | 0.758293839 | 0.033972465 | 727  | 56   | 13114 | 2.576930635 | 1           | 0.943820182 | 46.00663527 |
| GOTERM_MF_FAT   | GO:0015267~channel activity                              | 33  | 3.127962085 | 0.034249129 | 710  | 405  | 12549 | 1.440156495 | 1           | 0.921220332 | 41.79710835 |
| GOTERM_BP_FAT   | GO:0048598~embryonic morphogenesis                       | 26  | 2.464454976 | 0.034283501 | 727  | 307  | 13114 | 1.527691777 | 1           | 0.940426962 | 46.31578824 |
| GOTERM_BP_FAT   | GO:0060341~regulation of cellular localization           | 22  | 2.085308057 | 0.03463656  | 727  | 248  | 13114 | 1.600190797 | 1           | 0.937255537 | 46.66468468 |
| GOTERM_BP_FAT   | GO:0030030~cell projection organization                  | 30  | 2.843601896 | 0.034920432 | 727  | 368  | 13114 | 1.470531069 | 1           | 0.933744372 | 46.94365628 |
| UP_SEQ_FEATURE  | region of interest:Calmodulin-binding                    | 8   | 0.758293839 | 0.034967653 | 1037 | 55   | 18267 | 2.562216183 | 1           | 0.988778074 | 46.84950112 |
| GOTERM_MF_FAT   | GO:0022803~passive transmembrane transporter activity    | 33  | 3.127962085 | 0.035326186 | 710  | 406  | 12549 | 1.436609311 | 1           | 0.911143987 | 42.79709302 |
| GOTERM_BP_FAT   | GO:0019932~second-messenger-mediated signaling           | 21  | 1.990521327 | 0.035612877 | 727  | 234  | 13114 | 1.61884104  | 1           | 0.932403878 | 47.61838184 |
| GOTERM_BP_FAT   | GO:0035270~endocrine system development                  | 9   | 0.853080569 | 0.036111659 | 727  | 69   | 13114 | 2.35284971  | 1           | 0.930102793 | 48.09937212 |
| GOTERM_BP_FAT   | GO:0010518~positive regulation of phospholipase activity | 9   | 0.853080569 | 0.036111659 | 727  | 69   | 13114 | 2.35284971  | 1           | 0.930102793 | 48.09937212 |
| UP_SEQ_FEATURE  | site:Reactive bond                                       | 7   | 0.663507109 | 0.036715758 | 1037 | 44   | 18267 | 2.80242395  | 1           | 0.988936595 | 48.53344632 |

|                     |                                                                       |     |             |                 |      |      |       |             |             |             |             |
|---------------------|-----------------------------------------------------------------------|-----|-------------|-----------------|------|------|-------|-------------|-------------|-------------|-------------|
| UP_SEQ_FEATUR<br>E  | topological<br>domain:Extracellular                                   | 171 | 16.20853081 | 0.0369894<br>24 | 1037 | 2639 | 18267 | 1.14141925  | 1           | 0.986976589 | 48.79246601 |
| SMART               | SM00082:LRRCT                                                         | 11  | 1.042654028 | 0.0370356<br>61 | 530  | 88   | 8828  | 2.082075472 | 0.999960993 | 0.815841895 | 39.09840092 |
| UP_SEQ_FEATUR<br>E  | short sequence motif:Selectivity<br>filter                            | 8   | 0.758293839 | 0.0380848<br>99 | 1037 | 56   | 18267 | 2.516462323 | 1           | 0.986236845 | 49.81704291 |
| GOTERM_MF_FA<br>T   | GO:0004857~enzyme inhibitor<br>activity                               | 23  | 2.180094787 | 0.0380884<br>44 | 710  | 260  | 12549 | 1.563526544 | 1           | 0.911702913 | 45.28870726 |
| GOTERM_CC_FAT       | GO:0005882~intermediate<br>filament                                   | 17  | 1.611374408 | 0.0383906<br>83 | 713  | 171  | 12337 | 1.720175849 | 0.999999961 | 0.574038009 | 42.47032225 |
| GOTERM_BP_FAT       | GO:0051047~positive<br>regulation of secretion                        | 12  | 1.137440758 | 0.0387021<br>67 | 727  | 109  | 13114 | 1.985891498 | 1           | 0.938097788 | 50.53115208 |
| INTERPRO            | IPR003091:Voltage-dependent<br>potassium channel                      | 6   | 0.568720379 | 0.0397529<br>46 | 933  | 33   | 16090 | 3.135535418 | 1           | 0.966109328 | 48.54662781 |
| INTERPRO            | IPR002190:MAGE protein                                                | 6   | 0.568720379 | 0.0397529<br>46 | 933  | 33   | 16090 | 3.135535418 | 1           | 0.966109328 | 48.54662781 |
| GOTERM_BP_FAT       | GO:0016331~morphogenesis of<br>embryonic epithelium                   | 8   | 0.758293839 | 0.0401036<br>55 | 727  | 58   | 13114 | 2.488070958 | 1           | 0.939970098 | 51.80152328 |
| GOTERM_CC_FAT       | GO:0005615~extracellular<br>space                                     | 51  | 4.834123223 | 0.0403971<br>46 | 713  | 675  | 12337 | 1.307333645 | 0.999999984 | 0.57519847  | 44.14261286 |
| SP_PIR_KEYWOR<br>DS | disulfide bond                                                        | 181 | 17.1563981  | 0.0408772<br>81 | 1037 | 2819 | 18289 | 1.13238655  | 1           | 0.613737705 | 45.58922179 |
| GOTERM_BP_FAT       | GO:0030802~regulation of<br>cyclic nucleotide biosynthetic<br>process | 12  | 1.137440758 | 0.0409503<br>01 | 727  | 110  | 13114 | 1.967837939 | 1           | 0.939400534 | 52.55397415 |
| GOTERM_BP_FAT       | GO:0030808~regulation of<br>nucleotide biosynthetic process           | 12  | 1.137440758 | 0.0409503<br>01 | 727  | 110  | 13114 | 1.967837939 | 1           | 0.939400534 | 52.55397415 |
| GOTERM_MF_FA<br>T   | GO:0019206~nucleoside kinase<br>activity                              | 4   | 0.379146919 | 0.0409819<br>23 | 710  | 14   | 12549 | 5.049899396 | 1           | 0.912924439 | 47.7895533  |
| SP_PIR_KEYWOR<br>DS | neurotransmitter receptor                                             | 8   | 0.758293839 | 0.0411534<br>7  | 1037 | 57   | 18289 | 2.475291411 | 1           | 0.601277886 | 45.81725248 |
| SP_PIR_KEYWOR<br>DS | voltage-gated ion channel                                             | 3   | 0.28436019  | 0.0412841<br>93 | 1037 | 6    | 18289 | 8.818225651 | 1           | 0.588107948 | 45.92487034 |

|                     |                                                          |    |             |                 |      |     |       |             |             |             |             |
|---------------------|----------------------------------------------------------|----|-------------|-----------------|------|-----|-------|-------------|-------------|-------------|-------------|
| UP_SEQ_FEATUR<br>E  | domain:P-type                                            | 3  | 0.28436019  | 0.0413760<br>07 | 1037 | 6   | 18267 | 8.807618129 | 1           | 0.988638039 | 52.78003967 |
| GOTERM_BP_FAT       | GO:0007610~behavior                                      | 36 | 3.412322275 | 0.0417784<br>55 | 727  | 467 | 13114 | 1.390549293 | 1           | 0.938778906 | 53.27925217 |
| GOTERM_BP_FAT       | GO:0010517~regulation of<br>phospholipase activity       | 9  | 0.853080569 | 0.0417836<br>47 | 727  | 71  | 13114 | 2.286572253 | 1           | 0.93469262  | 53.2837657  |
| INTERPRO            | IPR002373:cAMP/cGMP-<br>dependent protein kinase         | 3  | 0.28436019  | 0.0430151<br>38 | 933  | 6   | 16090 | 8.622722401 | 1           | 0.9683418   | 51.33643093 |
| GOTERM_CC_FAT       | GO:0005903~brush border                                  | 7  | 0.663507109 | 0.0433108<br>07 | 713  | 45  | 12337 | 2.691569269 | 0.999999996 | 0.584172154 | 46.49072859 |
| GOTERM_MF_FA<br>T   | GO:0004620~phospholipase<br>activity                     | 10 | 0.947867299 | 0.0440581<br>66 | 710  | 83  | 12549 | 2.129475649 | 1           | 0.914916397 | 50.33081632 |
| INTERPRO            | IPR016044:Filament                                       | 9  | 0.853080569 | 0.0453073<br>66 | 933  | 69  | 16090 | 2.249405844 | 1           | 0.967896807 | 53.21107132 |
| GOTERM_CC_FAT       | GO:0045111~intermediate<br>filament cytoskeleton         | 17 | 1.611374408 | 0.0458494<br>61 | 713  | 175 | 12337 | 1.680857544 | 0.999999999 | 0.589221861 | 48.46151238 |
| GOTERM_MF_FA<br>T   | GO:0005254~chloride channel<br>activity                  | 9  | 0.853080569 | 0.0461583<br>53 | 710  | 71  | 12549 | 2.240448324 | 1           | 0.91217218  | 51.9987765  |
| GOTERM_BP_FAT       | GO:0044243~multicellular<br>organismal catabolic process | 5  | 0.473933649 | 0.0466541<br>38 | 727  | 25  | 13114 | 3.607702889 | 1           | 0.949460966 | 57.34155031 |
| GOTERM_BP_FAT       | GO:0007215~glutamate<br>signaling pathway                | 5  | 0.473933649 | 0.0466541<br>38 | 727  | 25  | 13114 | 3.607702889 | 1           | 0.949460966 | 57.34155031 |
| GOTERM_BP_FAT       | GO:0044236~multicellular<br>organismal metabolic process | 6  | 0.568720379 | 0.0466692<br>08 | 727  | 36  | 13114 | 3.006419074 | 1           | 0.946046968 | 57.35357238 |
| GOTERM_BP_FAT       | GO:0060042~retina<br>morphogenesis in camera-type<br>eye | 4  | 0.379146919 | 0.0467077<br>16 | 727  | 15  | 13114 | 4.810270518 | 1           | 0.942650143 | 57.38427937 |
| SP_PIR_KEYWOR<br>DS | hydroxylation                                            | 9  | 0.853080569 | 0.0469037<br>38 | 1037 | 71  | 18289 | 2.235606503 | 1           | 0.622143983 | 50.36736403 |
| GOTERM_CC_FAT       | GO:0044456~synapse part                                  | 22 | 2.085308057 | 0.0469862<br>25 | 713  | 246 | 12337 | 1.547417872 | 0.999999999 | 0.582840887 | 49.32194503 |
| GOTERM_BP_FAT       | GO:0007267~cell-cell signaling                           | 44 | 4.170616114 | 0.0474070<br>93 | 727  | 599 | 13114 | 1.32503278  | 1           | 0.941614638 | 57.93834805 |

|                 |                                                              |    |             |                 |      |     |       |             |   |             |             |
|-----------------|--------------------------------------------------------------|----|-------------|-----------------|------|-----|-------|-------------|---|-------------|-------------|
| GOTERM_BP_FAT   | GO:0030799~regulation of cyclic nucleotide metabolic process | 12 | 1.137440758 | 0.0482329<br>41 | 727  | 113 | 13114 | 1.915594454 | 1 | 0.941056822 | 58.58385563 |
| SP_PIR_KEYWORDS | Cardiomyopathy                                               | 7  | 0.663507109 | 0.0482504<br>79 | 1037 | 47  | 18289 | 2.626705513 | 1 | 0.619438403 | 51.38028618 |
| INTERPRO        | IPR018039:Intermediate filament protein, conserved site      | 9  | 0.853080569 | 0.0486734<br>55 | 933  | 70  | 16090 | 2.217271475 | 1 | 0.96998279  | 55.84140969 |
| INTERPRO        | IPR001664:Intermediate filament protein                      | 9  | 0.853080569 | 0.0486734<br>55 | 933  | 70  | 16090 | 2.217271475 | 1 | 0.96998279  | 55.84140969 |
| GOTERM_MF_FAT   | GO:0005230~extracellular ligand-gated ion channel activity   | 9  | 0.853080569 | 0.0494770<br>87 | 710  | 72  | 12549 | 2.209330986 | 1 | 0.915133355 | 54.5280438  |
| UP_SEQ_FEATURE  | domain:PDZ 4                                                 | 4  | 0.379146919 | 0.0496387<br>38 | 1037 | 15  | 18267 | 4.697396336 | 1 | 0.994412708 | 59.5082722  |
| GOTERM_MF_FAT   | GO:0005520~insulin-like growth factor binding                | 5  | 0.473933649 | 0.0496511<br>11 | 710  | 25  | 12549 | 3.534929577 | 1 | 0.904179764 | 54.65716691 |
| UP_SEQ_FEATURE  | domain:Ricin B-type lectin                                   | 5  | 0.473933649 | 0.0502884<br>38 | 1037 | 25  | 18267 | 3.523047252 | 1 | 0.993668607 | 59.99701354 |
| UP_SEQ_FEATURE  | domain:Collagen-like                                         | 6  | 0.568720379 | 0.0509417<br>99 | 1037 | 36  | 18267 | 2.93587271  | 1 | 0.992892104 | 60.48289034 |
| GOTERM_BP_FAT   | GO:0060191~regulation of lipase activity                     | 10 | 0.947867299 | 0.0509438<br>98 | 727  | 87  | 13114 | 2.073392465 | 1 | 0.946785688 | 60.63771528 |
| GOTERM_BP_FAT   | GO:0006928~cell motion                                       | 36 | 3.412322275 | 0.0509601<br>57 | 727  | 475 | 13114 | 1.367129516 | 1 | 0.943623408 | 60.64973802 |
| GOTERM_MF_FAT   | GO:0022834~ligand-gated channel activity                     | 13 | 1.232227488 | 0.0526007<br>6  | 710  | 126 | 12549 | 1.823574782 | 1 | 0.905958369 | 56.79424502 |
| GOTERM_MF_FAT   | GO:0015276~ligand-gated ion channel activity                 | 13 | 1.232227488 | 0.0526007<br>6  | 710  | 126 | 12549 | 1.823574782 | 1 | 0.905958369 | 56.79424502 |
| GOTERM_BP_FAT   | GO:0030817~regulation of cAMP biosynthetic process           | 11 | 1.042654028 | 0.0526779<br>71 | 727  | 101 | 13114 | 1.964590682 | 1 | 0.945902583 | 61.90064327 |
| GOTERM_BP_FAT   | GO:0018149~peptide cross-linking                             | 5  | 0.473933649 | 0.0528123<br>97 | 727  | 26  | 13114 | 3.468945085 | 1 | 0.943208891 | 61.99693162 |
| INTERPRO        | IPR017981:GPCR, family 2-like                                | 8  | 0.758293839 | 0.0532179<br>43 | 933  | 59  | 16090 | 2.338365397 | 1 | 0.974017032 | 59.17284474 |

|                 |                                                              |    |             |                 |      |     |       |             |             |             |             |
|-----------------|--------------------------------------------------------------|----|-------------|-----------------|------|-----|-------|-------------|-------------|-------------|-------------|
| KEGG_PATHWAY    | hsa00232:Caffeine metabolism                                 | 3  | 0.28436019  | 0.0532670<br>33 | 280  | 7   | 5042  | 7.717346939 | 0.999909077 | 0.95503323  | 48.71628578 |
| GOTERM_BP_FAT   | GO:0051491~positive regulation of filopodium assembly        | 3  | 0.28436019  | 0.0533830<br>57 | 727  | 7   | 13114 | 7.730791904 | 1           | 0.941895601 | 62.4031383  |
| GOTERM_BP_FAT   | GO:0051489~regulation of filopodium assembly                 | 3  | 0.28436019  | 0.0533830<br>57 | 727  | 7   | 13114 | 7.730791904 | 1           | 0.941895601 | 62.4031383  |
| GOTERM_BP_FAT   | GO:0046033~AMP metabolic process                             | 3  | 0.28436019  | 0.0533830<br>57 | 727  | 7   | 13114 | 7.730791904 | 1           | 0.941895601 | 62.4031383  |
| GOTERM_BP_FAT   | GO:0007216~metabotropic glutamate receptor signaling pathway | 3  | 0.28436019  | 0.0533830<br>57 | 727  | 7   | 13114 | 7.730791904 | 1           | 0.941895601 | 62.4031383  |
| GOTERM_BP_FAT   | GO:0001503~ossification                                      | 12 | 1.137440758 | 0.0535487<br>73 | 727  | 115 | 13114 | 1.882279768 | 1           | 0.939295163 | 62.5203282  |
| GOTERM_MF_FAT   | GO:0042277~peptide binding                                   | 18 | 1.706161137 | 0.0539674<br>8  | 710  | 197 | 12549 | 1.614942447 | 1           | 0.900897168 | 57.75217342 |
| BIOCARTA        | h_no1Pathway:Actions of Nitric Oxide in the Heart            | 4  | 0.379146919 | 0.0543771<br>51 | 70   | 18  | 1406  | 4.463492063 | 0.999262747 | 0.999262747 | 47.80695691 |
| GOTERM_BP_FAT   | GO:0001932~regulation of protein amino acid phosphorylation  | 16 | 1.516587678 | 0.0543809<br>21 | 727  | 172 | 13114 | 1.678001344 | 1           | 0.938870222 | 63.10360621 |
| GOTERM_BP_FAT   | GO:0060193~positive regulation of lipase activity            | 9  | 0.853080569 | 0.0548255<br>37 | 727  | 75  | 13114 | 2.164621733 | 1           | 0.937208543 | 63.41172793 |
| BIOCARTA        | h_nos1Pathway:Nitric Oxide Signaling Pathway                 | 3  | 0.28436019  | 0.0548762<br>28 | 70   | 8   | 1406  | 7.532142857 | 0.999311283 | 0.973756589 | 48.12640792 |
| UP_SEQ_FEATURE  | DNA-binding region:H-T-H motif winged-type                   | 3  | 0.28436019  | 0.0557832<br>35 | 1037 | 7   | 18267 | 7.549386968 | 1           | 0.994716406 | 63.91356104 |
| SP_PIR_KEYWORDS | tumor antigen                                                | 6  | 0.568720379 | 0.0560302<br>77 | 1037 | 37  | 18289 | 2.859965076 | 1           | 0.662978742 | 56.86473027 |
| GOTERM_BP_FAT   | GO:0006140~regulation of nucleotide metabolic process        | 12 | 1.137440758 | 0.0563481<br>66 | 727  | 116 | 13114 | 1.866053218 | 1           | 0.939015263 | 64.44862172 |
| SP_PIR_KEYWORDS | extracellular matrix                                         | 21 | 1.990521327 | 0.0564043<br>13 | 1037 | 241 | 18289 | 1.536786213 | 1           | 0.653052492 | 57.11329741 |
| GOTERM_BP_FAT   | GO:0019935~cyclic-nucleotide-                                | 13 | 1.232227488 | 0.0564242       | 727  | 130 | 13114 | 1.803851444 | 1           | 0.936246211 | 64.4996969  |

|                 |                                                             |     |             |                 |      |      |       |             |   |             |             |
|-----------------|-------------------------------------------------------------|-----|-------------|-----------------|------|------|-------|-------------|---|-------------|-------------|
|                 | mediated signaling                                          |     |             | 46              |      |      |       |             |   |             |             |
| GOTERM_BP_FAT   | GO:0015718~monocarboxylic acid transport                    | 7   | 0.663507109 | 0.0566034<br>65 | 727  | 50   | 13114 | 2.525392022 | 1 | 0.933789805 | 64.61973858 |
| GOTERM_CC_FAT   | GO:0045202~synapse                                          | 29  | 2.748815166 | 0.0577685<br>54 | 713  | 355  | 12337 | 1.413480039 | 1 | 0.645751156 | 56.8450638  |
| GOTERM_MF_FAT   | GO:0008603~cAMP-dependent protein kinase regulator activity | 4   | 0.379146919 | 0.0580170<br>55 | 710  | 16   | 12549 | 4.418661972 | 1 | 0.907184418 | 60.47514585 |
| GOTERM_BP_FAT   | GO:0008016~regulation of heart contraction                  | 9   | 0.853080569 | 0.0584494<br>2  | 727  | 76   | 13114 | 2.136139868 | 1 | 0.936670878 | 65.83407536 |
| GOTERM_BP_FAT   | GO:0030814~regulation of cAMP metabolic process             | 11  | 1.042654028 | 0.0587317<br>75 | 727  | 103  | 13114 | 1.92644329  | 1 | 0.934629892 | 66.01631269 |
| SP_PIR_KEYWORDS | cell membrane                                               | 138 | 13.08056872 | 0.0590679<br>88 | 1037 | 2131 | 18289 | 1.142107123 | 1 | 0.658468352 | 58.8452473  |
| GOTERM_MF_FAT   | GO:0005198~structural molecule activity                     | 44  | 4.170616114 | 0.0593503<br>27 | 710  | 597  | 12549 | 1.302654116 | 1 | 0.90247741  | 61.33510232 |
| GOTERM_BP_FAT   | GO:0032963~collagen metabolic process                       | 5   | 0.473933649 | 0.0593898<br>75 | 727  | 27   | 13114 | 3.340465638 | 1 | 0.933775581 | 66.4375079  |
| INTERPRO        | IPR003054:Type II keratin                                   | 5   | 0.473933649 | 0.0605639<br>69 | 933  | 26   | 16090 | 3.316431693 | 1 | 0.981157871 | 64.06356146 |
| INTERPRO        | IPR000772:Ricin B lectin                                    | 5   | 0.473933649 | 0.0605639<br>69 | 933  | 26   | 16090 | 3.316431693 | 1 | 0.981157871 | 64.06356146 |
| SP_PIR_KEYWORDS | differentiation                                             | 35  | 3.317535545 | 0.0605844<br>07 | 1037 | 455  | 18289 | 1.3566501   | 1 | 0.656412454 | 59.8019084  |
| GOTERM_BP_FAT   | GO:0021510~spinal cord development                          | 6   | 0.568720379 | 0.0623555<br>98 | 727  | 39   | 13114 | 2.775156068 | 1 | 0.939759639 | 68.27522223 |
| GOTERM_BP_FAT   | GO:0033555~multicellular organismal response to stress      | 6   | 0.568720379 | 0.0623555<br>98 | 727  | 39   | 13114 | 2.775156068 | 1 | 0.939759639 | 68.27522223 |
| GOTERM_MF_FAT   | GO:0022836~gated channel activity                           | 25  | 2.369668246 | 0.0628644<br>71 | 710  | 305  | 12549 | 1.44874163  | 1 | 0.906251869 | 63.51858887 |
| GOTERM_BP_FAT   | GO:0009719~response to endogenous stimulus                  | 31  | 2.938388626 | 0.0632625<br>85 | 727  | 405  | 13114 | 1.380725797 | 1 | 0.939619222 | 68.81799443 |
| GOTERM_MF_FAT   | GO:0005253~anion channel activity                           | 9   | 0.853080569 | 0.0642744<br>56 | 710  | 76   | 12549 | 2.093050408 | 1 | 0.902231944 | 64.36179478 |

|                 |                                                                                                                                           |    |             |             |      |     |       |             |             |             |             |
|-----------------|-------------------------------------------------------------------------------------------------------------------------------------------|----|-------------|-------------|------|-----|-------|-------------|-------------|-------------|-------------|
| KEGG_PATHWAY    | hsa00591:Linoleic acid metabolism                                                                                                         | 5  | 0.473933649 | 0.06596416  | 280  | 28  | 5042  | 3.215561224 | 0.999990842 | 0.944988879 | 56.50491886 |
| GOTERM_BP_FAT   | GO:0045017~glycerolipid biosynthetic process                                                                                              | 9  | 0.853080569 | 0.066141519 | 727  | 78  | 13114 | 2.081367051 | 1           | 0.944649983 | 70.48336121 |
| GOTERM_BP_FAT   | GO:0007200~activation of phospholipase C activity by G-protein coupled receptor protein signaling pathway coupled to IP3 second messenger | 7  | 0.663507109 | 0.066198297 | 727  | 52  | 13114 | 2.42826156  | 1           | 0.942315174 | 70.51534529 |
| GOTERM_BP_FAT   | GO:0006081~cellular aldehyde metabolic process                                                                                            | 5  | 0.473933649 | 0.066381304 | 727  | 28  | 13114 | 3.221163293 | 1           | 0.94028813  | 70.61821361 |
| GOTERM_BP_FAT   | GO:0015908~fatty acid transport                                                                                                           | 5  | 0.473933649 | 0.066381304 | 727  | 28  | 13114 | 3.221163293 | 1           | 0.94028813  | 70.61821361 |
| INTERPRO        | IPR000215:Protease inhibitor I4, serpin                                                                                                   | 6  | 0.568720379 | 0.066542246 | 933  | 38  | 16090 | 2.722964969 | 1           | 0.984678896 | 67.63186492 |
| SMART           | SM00458:RICIN                                                                                                                             | 5  | 0.473933649 | 0.066861324 | 530  | 26  | 8828  | 3.203193033 | 0.999999992 | 0.930003712 | 59.72127516 |
| GOTERM_MF_FAT   | GO:0008188~neuropeptide receptor activity                                                                                                 | 6  | 0.568720379 | 0.066866716 | 710  | 39  | 12549 | 2.719176598 | 1           | 0.902615634 | 65.86464964 |
| GOTERM_BP_FAT   | GO:0051270~regulation of cell motion                                                                                                      | 17 | 1.611374408 | 0.06698752  | 727  | 192 | 13114 | 1.597160133 | 1           | 0.939374407 | 70.95655282 |
| GOTERM_MF_FAT   | GO:0004867~serine-type endopeptidase inhibitor activity                                                                                   | 10 | 0.947867299 | 0.067267749 | 710  | 90  | 12549 | 1.963849765 | 1           | 0.895310632 | 66.09178005 |
| PIR_SUPERFAMILY | PIRSF001638:cystatin                                                                                                                      | 3  | 0.28436019  | 0.067851919 | 397  | 8   | 7196  | 6.797229219 | 1           | 0.992157423 | 62.65406302 |
| INTERPRO        | IPR001879:GPCR, family 2, extracellular region                                                                                            | 5  | 0.473933649 | 0.067973915 | 933  | 27  | 16090 | 3.193600889 | 1           | 0.983192672 | 68.43556433 |
| SP_PIR_KEYWORDS | collagen degradation                                                                                                                      | 4  | 0.379146919 | 0.068059614 | 1037 | 17  | 18289 | 4.149753247 | 1           | 0.689125498 | 64.22246396 |
| BIOCARTA        | h_dreampathway:Repression of Pain Sensation by the Transcriptional Regulator DREAM                                                        | 3  | 0.28436019  | 0.068359953 | 70   | 9   | 1406  | 6.695238095 | 0.999892103 | 0.952393047 | 56.10933641 |
| GOTERM_BP_FAT   | GO:0051050~positive                                                                                                                       | 19 | 1.800947867 | 0.0696740   | 727  | 223 | 13114 | 1.536913787 | 1           | 0.943713385 | 72.41218853 |



|                 |                                                      |    |             |             |      |     |       |             |             |             |             |
|-----------------|------------------------------------------------------|----|-------------|-------------|------|-----|-------|-------------|-------------|-------------|-------------|
|                 | regulation of transport                              |    |             | 75          |      |     |       |             |             |             |             |
| SP_PIR_KEYWORDS | protease inhibitor                                   | 11 | 1.042654028 | 0.070186468 | 1037 | 104 | 18289 | 1.865393888 | 1           | 0.689868986 | 65.39483594 |
| GOTERM_BP_FAT   | GO:0048839~inner ear development                     | 9  | 0.853080569 | 0.070211206 | 727  | 79  | 13114 | 2.055020633 | 1           | 0.942666745 | 72.69483329 |
| GOTERM_MF_FAT   | GO:0016494~C-X-C chemokine receptor activity         | 3  | 0.28436019  | 0.071140847 | 710  | 8   | 12549 | 6.627992958 | 1           | 0.900360102 | 68.21377041 |
| GOTERM_MF_FAT   | GO:0004372~glycine hydroxymethyltransferase activity | 3  | 0.28436019  | 0.071140847 | 710  | 8   | 12549 | 6.627992958 | 1           | 0.900360102 | 68.21377041 |
| SP_PIR_KEYWORDS | cAMP binding                                         | 3  | 0.28436019  | 0.071487328 | 1037 | 8   | 18289 | 6.613669238 | 1           | 0.68626001  | 66.09415981 |
| UP_SEQ_FEATURE  | domain:HP                                            | 3  | 0.28436019  | 0.071639865 | 1037 | 8   | 18267 | 6.605713597 | 1           | 0.998589525 | 73.28617673 |
| INTERPRO        | IPR000998:MAM                                        | 4  | 0.379146919 | 0.071793372 | 933  | 17  | 16090 | 4.057751718 | 1           | 0.984142508 | 70.48899887 |
| GOTERM_MF_FAT   | GO:0042923~neuropeptide binding                      | 6  | 0.568720379 | 0.073037712 | 710  | 40  | 12549 | 2.651197183 | 1           | 0.898566125 | 69.20707974 |
| KEGG_PATHWAY    | hsa00340:Histidine metabolism                        | 5  | 0.473933649 | 0.073335554 | 280  | 29  | 5042  | 3.104679803 | 0.999997619 | 0.924947525 | 60.51246489 |
| UP_SEQ_FEATURE  | domain:PDZ 1                                         | 6  | 0.568720379 | 0.074083778 | 1037 | 40  | 18267 | 2.642285439 | 1           | 0.998608455 | 74.50777061 |
| UP_SEQ_FEATURE  | domain:PDZ 2                                         | 6  | 0.568720379 | 0.074083778 | 1037 | 40  | 18267 | 2.642285439 | 1           | 0.998608455 | 74.50777061 |
| GOTERM_BP_FAT   | GO:0060491~regulation of cell projection assembly    | 4  | 0.379146919 | 0.074167582 | 727  | 18  | 13114 | 4.008558765 | 1           | 0.949395347 | 74.69407311 |
| GOTERM_BP_FAT   | GO:0046717~acid secretion                            | 4  | 0.379146919 | 0.074167582 | 727  | 18  | 13114 | 4.008558765 | 1           | 0.949395347 | 74.69407311 |
| INTERPRO        | IPR003128:Villin headpiece                           | 3  | 0.28436019  | 0.074360196 | 933  | 8   | 16090 | 6.467041801 | 1           | 0.983856267 | 71.79777904 |
| SMART           | SM00093:SERPIN                                       | 6  | 0.568720379 | 0.074493889 | 530  | 38  | 8828  | 2.62999007  | 0.999999999 | 0.925953651 | 63.84198234 |
| GOTERM_CC_FAT   | GO:0031253~cell projection                           | 8  | 0.758293839 | 0.0746925   | 713  | 64  | 12337 | 2.162868163 | 1           | 0.727953486 | 66.59114026 |

|                 |                                                                                                                                          |     |             |                 |      |      |       |             |             |             |             |
|-----------------|------------------------------------------------------------------------------------------------------------------------------------------|-----|-------------|-----------------|------|------|-------|-------------|-------------|-------------|-------------|
|                 | membrane                                                                                                                                 |     |             | 47              |      |      |       |             |             |             |             |
| SMART           | SM00008:HormR                                                                                                                            | 5   | 0.473933649 | 0.0749374<br>34 | 530  | 27   | 8828  | 3.084556254 | 0.999999999 | 0.902525285 | 64.06902853 |
| GOTERM_BP_FAT   | GO:0009260~ribonucleotide biosynthetic process                                                                                           | 12  | 1.137440758 | 0.0751778<br>69 | 727  | 122  | 13114 | 1.774280109 | 1           | 0.949407778 | 75.18198192 |
| INTERPRO        | IPR001173:Glycosyl transferase, family 2                                                                                                 | 5   | 0.473933649 | 0.0758285<br>03 | 933  | 28   | 16090 | 3.079543715 | 1           | 0.982560815 | 72.52173325 |
| INTERPRO        | IPR016160:Aldehyde dehydrogenase, conserved site                                                                                         | 5   | 0.473933649 | 0.0758285<br>03 | 933  | 28   | 16090 | 3.079543715 | 1           | 0.982560815 | 72.52173325 |
| SP_PIR_KEYWORDS | membrane                                                                                                                                 | 367 | 34.78672986 | 0.0759772<br>21 | 1037 | 6079 | 18289 | 1.064743811 | 1           | 0.698999408 | 68.40803784 |
| SMART           | SM00137:MAM                                                                                                                              | 4   | 0.379146919 | 0.0777596<br>58 | 530  | 17   | 8828  | 3.919200888 | 1           | 0.886679961 | 65.48311973 |
| GOTERM_MF_FAT   | GO:0016646~oxidoreductase activity, acting on the CH-NH group of donors, NAD or NADP as acceptor                                         | 4   | 0.379146919 | 0.0778360<br>24 | 710  | 18   | 12549 | 3.927699531 | 1           | 0.905904008 | 71.5916483  |
| GOTERM_MF_FAT   | GO:0016702~oxidoreductase activity, acting on single donors with incorporation of molecular oxygen, incorporation of two atoms of oxygen | 8   | 0.758293839 | 0.0779004<br>99 | 710  | 66   | 12549 | 2.142381562 | 1           | 0.898649795 | 71.62248036 |
| GOTERM_BP_FAT   | GO:0060348~bone development                                                                                                              | 12  | 1.137440758 | 0.0786607<br>94 | 727  | 123  | 13114 | 1.759855068 | 1           | 0.9542777   | 76.79683103 |
| SMART           | SM00153:VHP                                                                                                                              | 3   | 0.28436019  | 0.0789071<br>06 | 530  | 8    | 8828  | 6.246226415 | 1           | 0.866014855 | 66.04320923 |
| GOTERM_BP_FAT   | GO:0043583~ear development                                                                                                               | 10  | 0.947867299 | 0.0796970<br>94 | 727  | 95   | 13114 | 1.898790994 | 1           | 0.954283    | 77.2578248  |
| GOTERM_BP_FAT   | GO:0003002~regionalization                                                                                                               | 17  | 1.611374408 | 0.0801176<br>83 | 727  | 197  | 13114 | 1.556623074 | 1           | 0.953154615 | 77.44244455 |
| GOTERM_BP_FAT   | GO:0048663~neuron fate commitment                                                                                                        | 6   | 0.568720379 | 0.0806625<br>79 | 727  | 42   | 13114 | 2.576930635 | 1           | 0.952263556 | 77.67952588 |
| KEGG_PATHWAY    | hsa00512:O-Glycan biosynthesis                                                                                                           | 5   | 0.473933649 | 0.0811064<br>6  | 280  | 30   | 5042  | 3.001190476 | 0.999999431 | 0.908970821 | 64.36788905 |

|                 |                                                                                                    |     |             |             |      |      |       |             |   |             |             |
|-----------------|----------------------------------------------------------------------------------------------------|-----|-------------|-------------|------|------|-------|-------------|---|-------------|-------------|
| GOTERM_MF_FAT   | GO:0022838~substrate specific channel activity                                                     | 30  | 2.843601896 | 0.081306407 | 710  | 391  | 12549 | 1.356111091 | 1 | 0.90161056  | 73.20738794 |
| GOTERM_BP_FAT   | GO:0034614~cellular response to reactive oxygen species                                            | 5   | 0.473933649 | 0.081576375 | 727  | 30   | 13114 | 3.006419074 | 1 | 0.952072058 | 78.07184219 |
| GOTERM_MF_FAT   | GO:0016701~oxidoreductase activity, acting on single donors with incorporation of molecular oxygen | 8   | 0.758293839 | 0.082980914 | 710  | 67   | 12549 | 2.110405718 | 1 | 0.899432672 | 73.95586801 |
| GOTERM_MF_FAT   | GO:0030594~neurotransmitter receptor activity                                                      | 10  | 0.947867299 | 0.083434258 | 710  | 94   | 12549 | 1.88028169  | 1 | 0.893764505 | 74.15511508 |
| PIR_SUPERFAMILY | PIRSF005569:ultra-high-sulfur keratin                                                              | 3   | 0.28436019  | 0.084143235 | 397  | 9    | 7196  | 6.041981528 | 1 | 0.994474486 | 70.83220664 |
| GOTERM_BP_FAT   | GO:0051966~regulation of synaptic transmission, glutamatergic                                      | 4   | 0.379146919 | 0.084595854 | 727  | 19   | 13114 | 3.797581988 | 1 | 0.955628928 | 79.32240404 |
| GOTERM_BP_FAT   | GO:0042220~response to cocaine                                                                     | 4   | 0.379146919 | 0.084595854 | 727  | 19   | 13114 | 3.797581988 | 1 | 0.955628928 | 79.32240404 |
| GOTERM_BP_FAT   | GO:0014073~response to tropane                                                                     | 4   | 0.379146919 | 0.084595854 | 727  | 19   | 13114 | 3.797581988 | 1 | 0.955628928 | 79.32240404 |
| GOTERM_BP_FAT   | GO:0030574~collagen catabolic process                                                              | 4   | 0.379146919 | 0.084595854 | 727  | 19   | 13114 | 3.797581988 | 1 | 0.955628928 | 79.32240404 |
| GOTERM_BP_FAT   | GO:0044271~nitrogen compound biosynthetic process                                                  | 25  | 2.369668246 | 0.08464752  | 727  | 322  | 13114 | 1.40050578  | 1 | 0.953934875 | 79.34320475 |
| GOTERM_BP_FAT   | GO:0001976~neurological system process involved in regulation of systemic arterial blood pressure  | 3   | 0.28436019  | 0.085071838 | 727  | 9    | 13114 | 6.012838148 | 1 | 0.952884843 | 79.51328743 |
| GOTERM_BP_FAT   | GO:0045176~apical protein localization                                                             | 3   | 0.28436019  | 0.085071838 | 727  | 9    | 13114 | 6.012838148 | 1 | 0.952884843 | 79.51328743 |
| GOTERM_BP_FAT   | GO:0032781~positive regulation of ATPase activity                                                  | 3   | 0.28436019  | 0.085071838 | 727  | 9    | 13114 | 6.012838148 | 1 | 0.952884843 | 79.51328743 |
| UP_SEQ_FEATURE  | transmembrane region                                                                               | 290 | 27.48815166 | 0.085155396 | 1037 | 4755 | 18267 | 1.07432566  | 1 | 0.99936863  | 79.41087353 |
| GOTERM_MF_FAT   | GO:0030246~carbohydrate binding                                                                    | 27  | 2.559241706 | 0.086005195 | 710  | 347  | 12549 | 1.375260787 | 1 | 0.894417197 | 75.25834134 |

|                    |                                                                                        |    |             |                 |      |     |       |             |             |             |             |
|--------------------|----------------------------------------------------------------------------------------|----|-------------|-----------------|------|-----|-------|-------------|-------------|-------------|-------------|
| KEGG_PATHWAY       | hsa00983:Drug metabolism                                                               | 6  | 0.568720379 | 0.0866688<br>37 | 280  | 43  | 5042  | 2.512624585 | 0.999999797 | 0.889381044 | 66.91192244 |
| GOTERM_BP_FAT      | GO:0034599~cellular response to oxidative stress                                       | 6  | 0.568720379 | 0.0873357<br>83 | 727  | 43  | 13114 | 2.517002015 | 1           | 0.955019453 | 80.39864578 |
| UP_SEQ_FEATUR<br>E | domain:MAGE                                                                            | 5  | 0.473933649 | 0.0874684<br>37 | 1037 | 30  | 18267 | 2.93587271  | 1           | 0.999355845 | 80.3159234  |
| GOTERM_BP_FAT      | GO:0044057~regulation of system process                                                | 24 | 2.274881517 | 0.0881209<br>91 | 727  | 308 | 13114 | 1.405598528 | 1           | 0.954614233 | 80.69718818 |
| GOTERM_MF_FA<br>T  | GO:0019958~C-X-C chemokine binding                                                     | 3  | 0.28436019  | 0.0881320<br>87 | 710  | 9   | 12549 | 5.891549296 | 1           | 0.893800275 | 76.13755446 |
| GOTERM_MF_FA<br>T  | GO:0016861~intramolecular oxidoreductase activity, interconverting aldoses and ketoses | 3  | 0.28436019  | 0.0881320<br>87 | 710  | 9   | 12549 | 5.891549296 | 1           | 0.893800275 | 76.13755446 |
| GOTERM_MF_FA<br>T  | GO:0004890~GABA-A receptor activity                                                    | 4  | 0.379146919 | 0.0887093<br>3  | 710  | 19  | 12549 | 3.720978503 | 1           | 0.888841988 | 76.37108093 |
| GOTERM_MF_FA<br>T  | GO:0002020~protease binding                                                            | 4  | 0.379146919 | 0.0887093<br>3  | 710  | 19  | 12549 | 3.720978503 | 1           | 0.888841988 | 76.37108093 |
| UP_SEQ_FEATUR<br>E | site:Reactive site                                                                     | 3  | 0.28436019  | 0.0887354<br>94 | 1037 | 9   | 18267 | 5.871745419 | 1           | 0.99928249  | 80.79564798 |
| UP_SEQ_FEATUR<br>E | domain:EGF-like 1; calcium-binding                                                     | 4  | 0.379146919 | 0.0895454<br>23 | 1037 | 19  | 18267 | 3.708470791 | 1           | 0.999175038 | 81.0964944  |
| GOTERM_CC_FAT      | GO:0045211~postsynaptic membrane                                                       | 13 | 1.232227488 | 0.0899276<br>92 | 713  | 135 | 12337 | 1.666209548 | 1           | 0.781650821 | 73.57388456 |
| GOTERM_MF_FA<br>T  | GO:0005216~ion channel activity                                                        | 29 | 2.748815166 | 0.0903205<br>99 | 710  | 380 | 12549 | 1.348854707 | 1           | 0.886929216 | 77.01166465 |
| UP_SEQ_FEATUR<br>E | lipid moiety-binding region:S-palmitoyl cysteine                                       | 16 | 1.516587678 | 0.0906662<br>61 | 1037 | 181 | 18267 | 1.557147957 | 1           | 0.999082252 | 81.50549778 |
| INTERPRO           | IPR003150:DNA-binding RFX                                                              | 3  | 0.28436019  | 0.0920333<br>73 | 933  | 9   | 16090 | 5.748481601 | 1           | 0.991551321 | 79.43453651 |
| INTERPRO           | IPR017857:Coagulation factor, subset, Gla region                                       | 3  | 0.28436019  | 0.0920333<br>73 | 933  | 9   | 16090 | 5.748481601 | 1           | 0.991551321 | 79.43453651 |
| INTERPRO           | IPR019794:Peroxidase, active site                                                      | 3  | 0.28436019  | 0.0920333<br>73 | 933  | 9   | 16090 | 5.748481601 | 1           | 0.991551321 | 79.43453651 |

|                 |                                                                  |    |             |             |      |     |       |             |             |             |             |
|-----------------|------------------------------------------------------------------|----|-------------|-------------|------|-----|-------|-------------|-------------|-------------|-------------|
| GOTERM_MF_FAT   | GO:0019205~nucleobase, nucleoside, nucleotide kinase activity    | 6  | 0.568720379 | 0.093333274 | 710  | 43  | 12549 | 2.466229938 | 1           | 0.889005755 | 78.16602963 |
| SP_PIR_KEYWORDS | postsynaptic cell membrane                                       | 11 | 1.042654028 | 0.093888742 | 1037 | 110 | 18289 | 1.76364513  | 1           | 0.767201091 | 76.25288918 |
| INTERPRO        | IPR004182:GRAM                                                   | 4  | 0.379146919 | 0.094025982 | 933  | 19  | 16090 | 3.630619958 | 1           | 0.99097723  | 80.16151138 |
| GOTERM_BP_FAT   | GO:0006813~potassium ion transport                               | 14 | 1.327014218 | 0.095506844 | 727  | 157 | 13114 | 1.60852995  | 1           | 0.964014956 | 83.3029053  |
| GOTERM_BP_FAT   | GO:0009126~purine nucleoside monophosphate metabolic process     | 4  | 0.379146919 | 0.095607479 | 727  | 20  | 13114 | 3.607702889 | 1           | 0.962698213 | 83.33600061 |
| GOTERM_BP_FAT   | GO:0009167~purine ribonucleoside monophosphate metabolic process | 4  | 0.379146919 | 0.095607479 | 727  | 20  | 13114 | 3.607702889 | 1           | 0.962698213 | 83.33600061 |
| PIR_SUPERFAMILY | PIRSF001630:serpin                                               | 5  | 0.473933649 | 0.096494189 | 397  | 32  | 7196  | 2.832178841 | 1           | 0.994758849 | 75.88730868 |
| GOTERM_MF_FAT   | GO:0008289~lipid binding                                         | 33 | 3.127962085 | 0.097024911 | 710  | 446 | 12549 | 1.307765427 | 1           | 0.892747492 | 79.50661293 |
| GOTERM_BP_FAT   | GO:0032956~regulation of actin cytoskeleton organization         | 9  | 0.853080569 | 0.097771471 | 727  | 85  | 13114 | 1.909960353 | 1           | 0.964117323 | 84.03285652 |
| BIOCARTA        | h_extrinsicPathway:Extrinsic Prothrombin Activation Pathway      | 3  | 0.28436019  | 0.098077808 | 70   | 11  | 1406  | 5.477922078 | 0.999998353 | 0.964173647 | 69.89491176 |
